# Supplementary material for: Gold nanoring arrays from responsive block copolymer templates
Source: Royal Society of Chemistry journal article supplement (doi:10.1039/b906825b), 2009-01-01
Supplement: b906825b.pdf [file b906825b.pdf]

**Electronic Supplementary Information for:**

# Synthesis of Gold Nanoring Arrays by Block Copolymer Templates

**Li Wang,<sup>a,b</sup> Franck Montagne,<sup>\*a</sup> Patrik Hoffmann,<sup>b</sup> Raphael Pugin<sup>a</sup>**

*<sup>a</sup>Centre Suisse d'Electronique et de Microtechnique SA, Jaquet Droz 1, CH-2007 Neuchâtel, Switzerland; E-mail: Franck.Montagne@csem.ch*

*<sup>b</sup>Ecole Polytechnique Fédérale de Lausanne, Laboratoire d'Optique Appliqué, CH-1015 Lausanne, Switzerland*

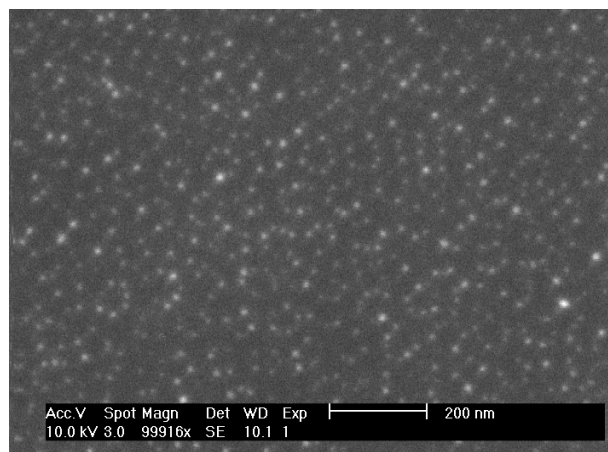

Fig. S1 SEM image of gold nanostructures prepared by immersion of reverse PS-*b*-P2VP micelles (102-97 kg/mol, 0.5 wt% in o-xylene) successively in 0.9 wt% HCl (aq.) and in 1 mM HAuCl<sub>4</sub> (aq.), followed by oxygen plasma treatment.

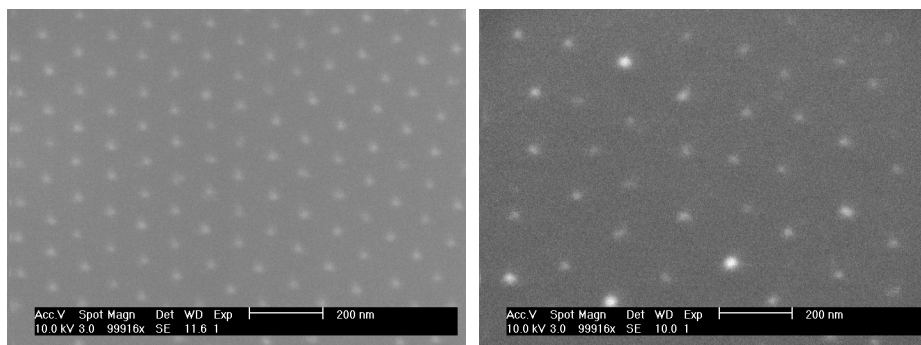

Fig. S2 SEM images of (left) gold and (right) silver nanoparticles produced by immersion of reverse PS-*b*-P2VP micelles in 1 mM aqueous solution of HAuCl<sub>4</sub> and AgNO<sub>3</sub> for 1 min, respectively, followed by oxygen plasma exposure. Here, gold and silver nanoparticles were obtained from PS-*b*-P2VP having molecular weight of 102-97 kg/mol and 190-190 kg/mol, respectively. Similar results were obtained when using methanol as a solvent.

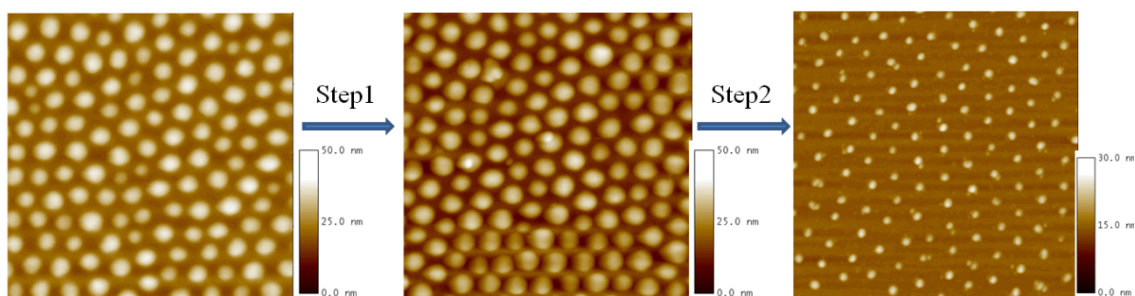

Fig. S3 AFM topography images ( $1 \times 1 \mu\text{m}^2$  scan) of (left) reverse PS-*b*-P2VP (102-97 kg/mol, 0.5 wt% in *o*-xylene) micelles spin-coated at 4000 rpm on silicon substrate, (center) loaded micelles after immersion in 1 mM H<sub>Au</sub>Cl<sub>4</sub> (aq.) for 10 min, and (right) gold nanoparticle array after oxygen plasma treatment.

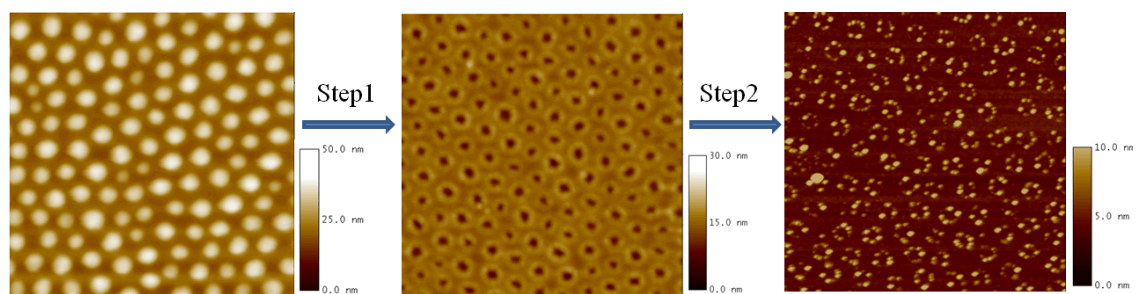

Fig. S4 AFM topography images ( $1 \times 1 \mu\text{m}^2$  scan) of (left) reverse PS-*b*-P2VP (102-97 kg/mol, 0.5 wt% in *o*-xylene) micelles spin-coated at 4000 rpm on silicon substrate, (center) loaded polymeric nanorings after immersion in 1 mM  $\text{HAuCl}_4$  /0.9 wt% HCl (aq.) for 10 min, and (right) gold nanoring array after oxygen plasma treatment.
